# Supplementary material
Source: HighWire-hosted journal article supplement (https://jnm.snmjournals.org/highwire/filestream/95553/field_highwire_adjunct_files/0/232603_Supplemental_Data.pdf)
Supplement: 232603_Supplemental_Data.pdf [file 232603_Supplemental_Data.pdf]

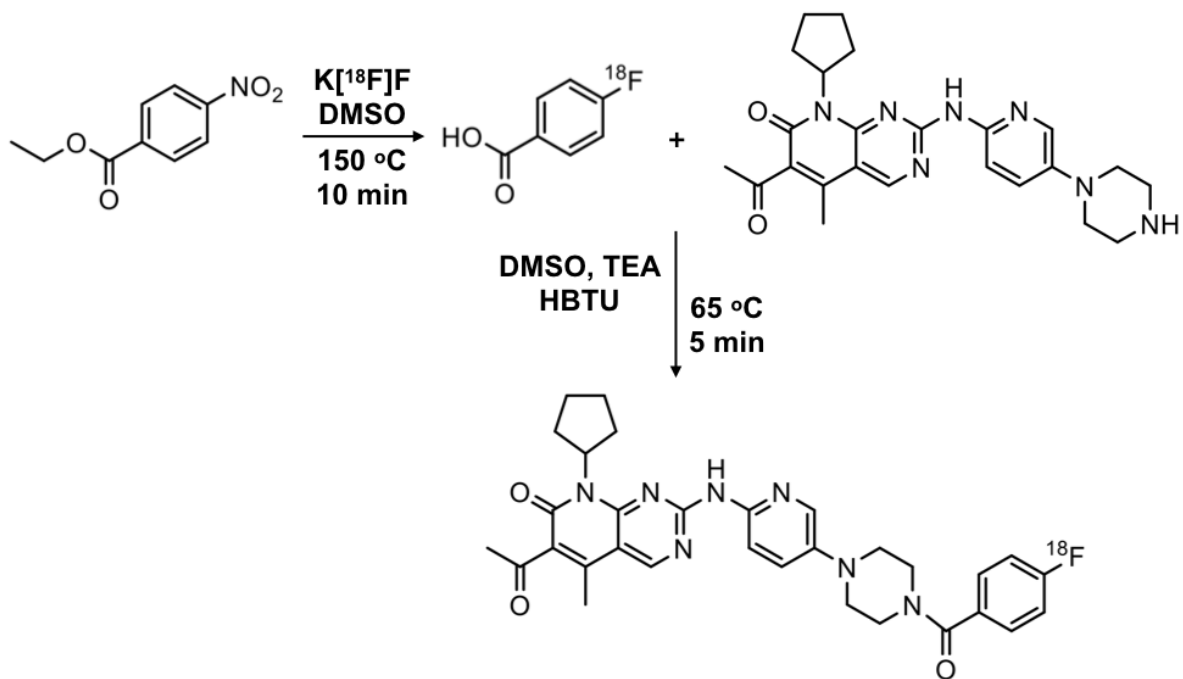

SUPPL. FIGURE 1: Synthetic radiolabeling strategy.

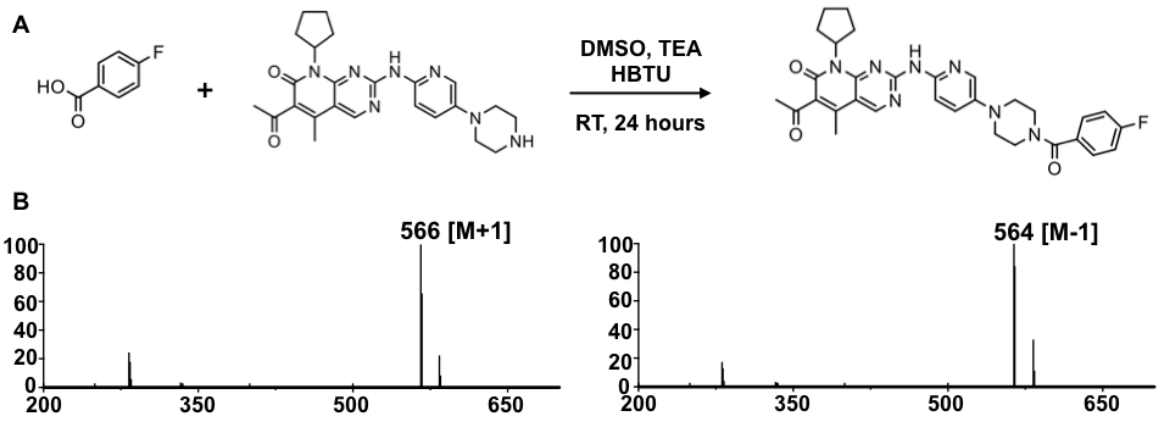

**SUPPL. FIGURE 2: Synthetic radiolabeling strategy.**

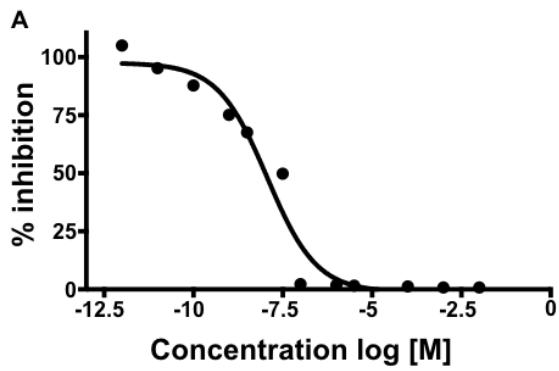

**ATP vs <sup>19</sup>F-CDKi  
Promega CellTiter-Glo®**

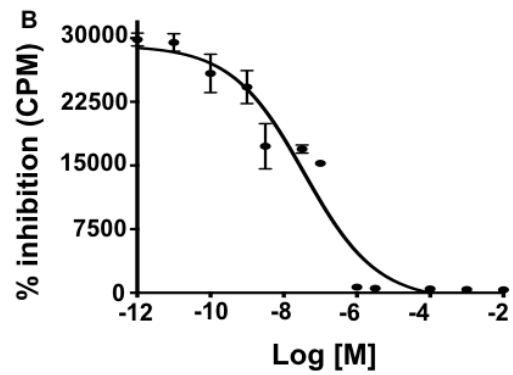

**[<sup>18</sup>F]-CDKi vs. Palbociclib**

**SUPPL. FIGURE 3: IC50 determination**

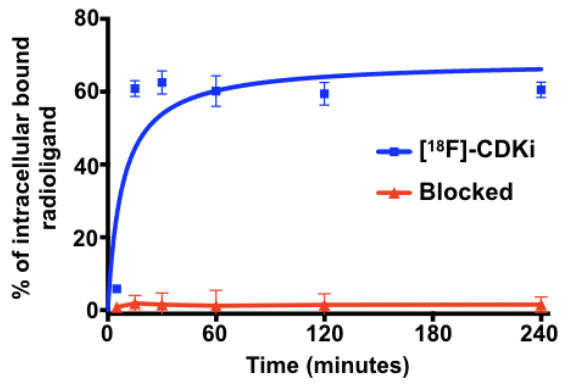

SUPPL. FIGURE 4: in vitro [<sup>18</sup>F]-CDKi uptake.

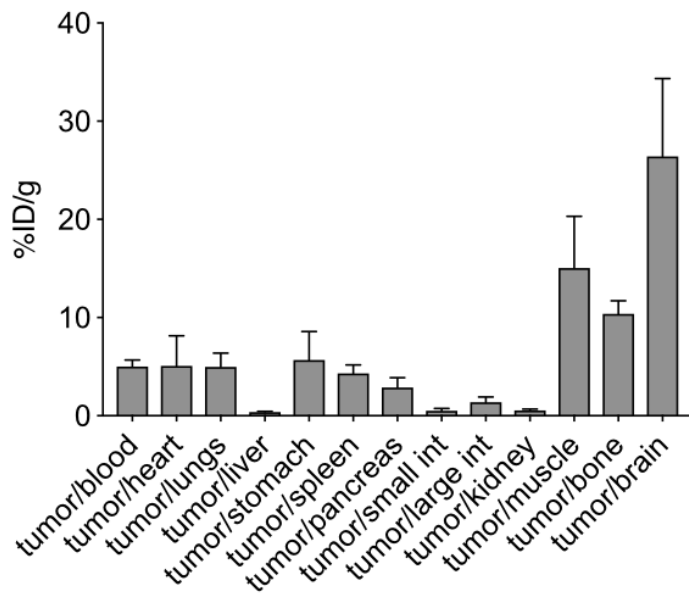

**SUPPL. FIGURE 5: Tumor-to-non-target tissue ratio**
